# Supplementary material for: Phytic acid determination in food products using the extract of rice sprout and SBA@DABCO nanoparticle-modified filter paper as a novel electrochemical biosensor
Source: Royal Society of Chemistry journal article supplement (doi:10.1039/d2ay01113a), 2022-01-01
Supplement: d2ay01113a1.pdf [file d2ay01113a1.pdf]

## Supplementary Information

### **Phytic acid determination in food products by extract of rice sprout and SBA@DABCO nanoparticles modified filter paper as a novel electrochemical biosensor**

Mohadeseh Rahimi-Mohseni<sup>a</sup>, Jahan Bakhsh Raouf<sup>a,\*</sup>, Tahereh A. Aghajanzadeh<sup>b</sup>,

<sup>a</sup>Electroanalytical Chemistry Research Laboratory, Department of Analytical Chemistry, Faculty of Chemistry, University of Mazandaran, Babolsar, Iran

<sup>b</sup>Department of Biology, Faculty of Basic Sciences, University of Mazandaran, Babolsar, Iran

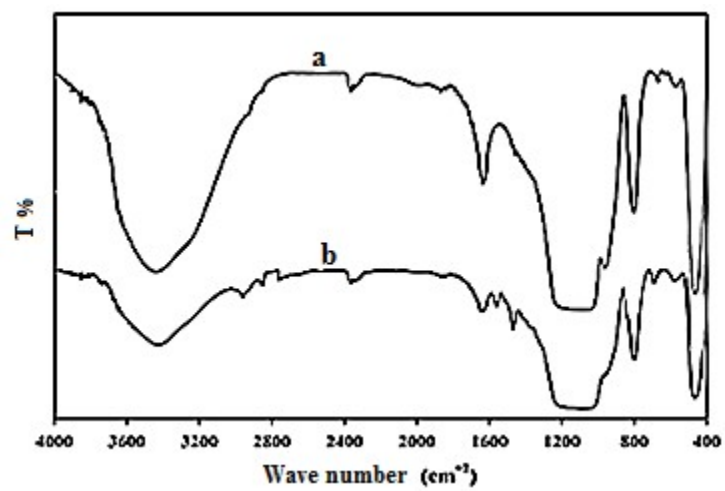

**Fig. S1.** FT-IR spectra of (a) SBA-15 and (b) SBA@DABCO

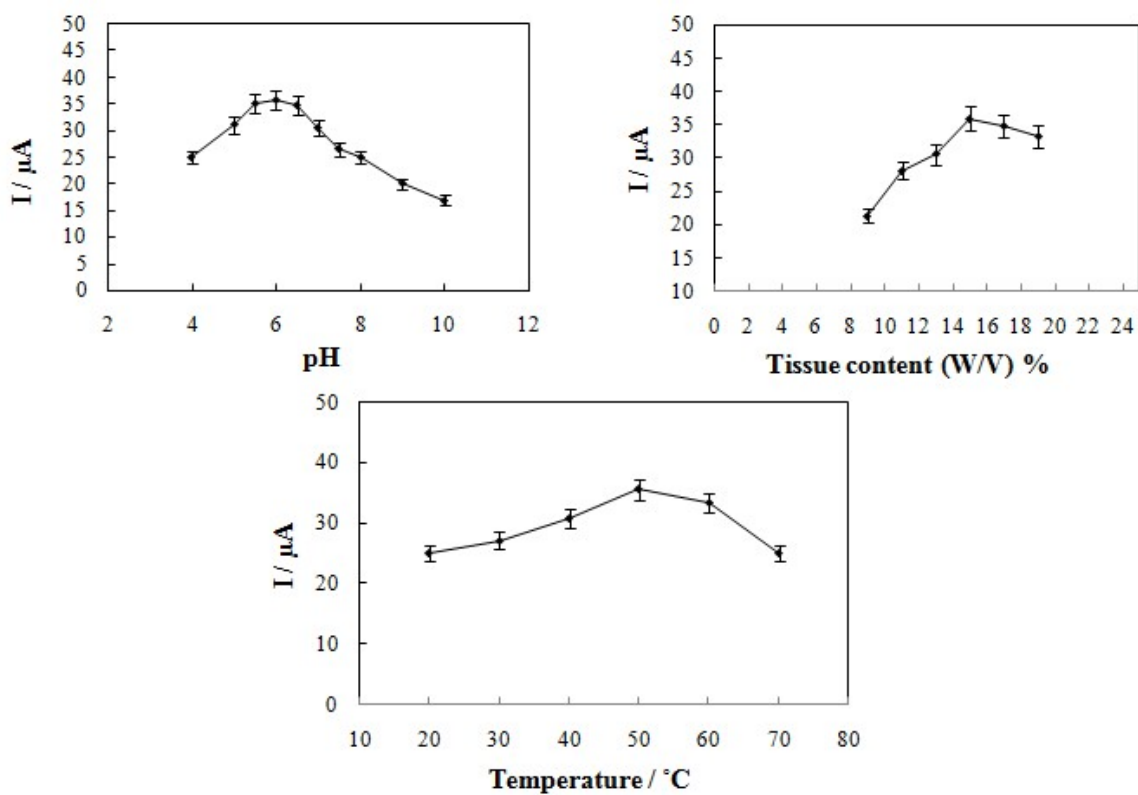

**Fig. S2.** The optimization of the experimental parameters on the purposed biosensor: Effects of (a) pH values, (b) tissue extract-loaded concentrations, (c) temperature of the tissue extract solution on the DPV responses to 2  $\mu\text{M}$  of PA in 0.1 M PBS and 0.1 M borate buffer solution (for pH 8.0 to 10.0)

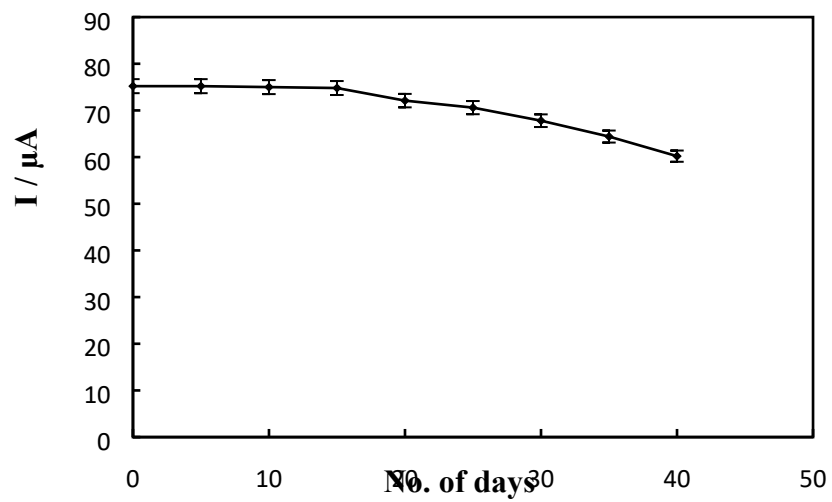

**Fig. S3.** The SBA@DABCO/PHY/GSPE stability on the DPV responses of 5 μM of PA in 0.1 M PBS (pH 6.0)

**Table S1.** Comparison of the PA determination at the SBA@DABCO/PHY/GSPE with some other modified electrodes reported by other research groups

| Transducer                                                              | Detection technique | LOD ( $\mu\text{M}$ ) | LDR ( $\mu\text{M}$ ) | Ref.      |
|-------------------------------------------------------------------------|---------------------|-----------------------|-----------------------|-----------|
| Graphitic carbon nitride-chitosan nanosheets on glassy carbon electrode | DPV                 | 2.16                  | 5.41 – 27.05          | 1         |
| Polypyrrole/phytase on Pt disk                                          | Amperometry         | 150                   | 500 – 2000            | 2         |
| Phytase and pyruvate oxidase on platinum electrode                      | Amperometry         | 2.00                  | 200 – 2000            | 3         |
| SBA@DABCO/<br>PHY/SPE                                                   | DPV                 | 0.04                  | 0.1 – 10.0            | This work |

1. C. Esmaili, P. Norouzi, S. A. Atabay, H. Ahmadzadeh and E. K. Goharshadi, *Sensor Letters*, 2018, **16**, 573-579.
2. V. C. Rodrigues, M. L. de Moraes, A. Brisolari, J. C. Soares, M. Ferreira and D. Gonçalves, *Sensors and Actuators B: Chemical*, 2011, **160**, 222-226.
3. W. C. Mak, Y. M. Ng, C. Chan, W. K. Kwong and R. Renneberg, *Biosensors and Bioelectronics*, 2004, **19**, 1029-1035.
